# Supplementary material for: The General Surgery Residency Experience: A Multicenter Study of Differences in Wellbeing by Race/Ethnicity
Source: PubMed Central journal article supplement — Ann Surg Open. 2022 Jul 18;3(3):e187. doi: 10.1097/AS9.0000000000000187 (PMC10431302; doi:10.1097/as9.0000000000000187), 2022-07-18
Supplement: as9-3-e187-s001.pdf [file as9-3-e187-s001.pdf]

## **Appendix 1. Components of Survey Instrument**

### Mental Health Continuum-Short Form (MHC-SF)

- a 14-item measure of individual social, emotional, and psychological mental health domains, with high internal consistency ( $>0.80$ )<sup>1</sup> and clinical relevance.<sup>2</sup>
- Similar to standard diagnostic criteria for depression, the MHC-SF items are scored according to the frequency with which respondents experience each symptom of positive mental health.
- Per convention, categorical designations are not limited to a specific numeric cut-off. Rather, ‘flourishing’ represents experiencing high positive functioning and high positive emotions ‘every day’ or ‘almost every day’. Scores can also be treated continuously.<sup>3</sup>

### Cognitive Affective Mindfulness Scale-Revised (CAMS-R)

- a 10-item measure of both dispositional and trained mindfulness in the form of attention, present-focus, awareness, and acceptance, with internal consistency (0.7-0.74)<sup>4</sup> and a calculated global score sensitive to mindfulness training.<sup>5</sup>
- Higher CAMS-R scores are associated with lower odds of distress in surgical trainees.<sup>4,6</sup>

### Abbreviated Maslach Burnout Inventory (aMBI)

- a 9-item validated screen<sup>7</sup> for high emotional exhaustion, depersonalization, and personal accomplishment, each associated with multiple negative sequelae in surgical trainees.<sup>6,8,9,10</sup>

### Cohen’s Perceived Stress Scale (PSS)

- a 10-item widely-used measure of stress, with high internal consistency ( $>0.80$ )<sup>11,12</sup> and normative data for men and women aged 18-34.
- High PSS scores correlate with cognitive impairment, missed work and disability.<sup>13</sup>

### Spielberger’s State Trait Anxiety Index (STAI)

- a 6-item measure of subjective feelings (e.g., apprehension, tension) and autonomic arousal,<sup>14-18</sup> correlated with state anxiety. In surgical trainees during real-life and simulated trauma scenarios the STAI has high internal consistency (0.92).<sup>19</sup>

### Patient Health Questionnaire-8 (PHQ-8)

- an 8-item rigorously evaluated depression screening tool<sup>20</sup> with high internal consistency (0.88).<sup>21</sup>
- A total score of  $\geq 10$  is correlated with increased use of clinical resources.<sup>2</sup>

### Swedish Demand-Control-Support Questionnaire (DCSQ)

- a 16-item measure of job strain with good internal consistency (0.7-0.85)<sup>22</sup> rooted in Job Demand-Resource theory. Subdomains exist for Demand, Control and Support.
- High workplace demand and low control are known risks for job strain, while high workplace control and social support are shown to decrease risk and mitigate the effects of demand.<sup>22,23</sup>
- ‘High’ subdomain designations are defined as scores within the upper third of the total possible score.<sup>22</sup>

## References

1. Keyes CLM. Mental Illness and/or Mental Health? Investigating Axioms of the Complete State Model of Health. *J Consult Clin Psychol*. 2005;73(3):539-548. doi:10.1037/0022-006X.73.3.539
2. Sen S, Kranzler HR, Krystal JH, et al. A Prospective Cohort Study Investigating Factors Associated With Depression During Medical Internship. *Arch Gen Psychiatry*. 2010;67(6):557. doi:10.1001/archgenpsychiatry.2010.41
3. Lamers SMA, Westerhof GJ, Bohlmeijer ET, ten Klooster PM, Keyes CLM. Evaluating the psychometric properties of the mental health Continuum-Short Form (MHC-SF). *J Clin Psychol*. 2011;67(1):99-110. doi:10.1002/jclp.20741
4. Feldman G, Hayes A, Kumar S, Greeson J, Laurenceau JP. Mindfulness and Emotion Regulation: The Development and Initial Validation of the Cognitive and Affective Mindfulness Scale-Revised (CAMS-R). *J Psychopathol Behav Assess*. 2007;29(3):177-190. doi:10.1007/s10862-006-9035-8
5. Grant F, Guille C, Sen S. Well-Being and the Risk of Depression under Stress. Laks J, ed. *PLoS ONE*. 2013;8(7):e67395. doi:10.1371/journal.pone.0067395
6. Lebares CC, Hershberger AO, Guvva EV, et al. Feasibility of Formal Mindfulness-Based Stress-Resilience Training Among Surgery Interns: A Randomized Clinical Trial. *JAMA Surg*. 2018;153(10):e182734. doi:10.1001/jamasurg.2018.2734
7. Maslach C, Leiter MP. Understanding the burnout experience: recent research and its implications for psychiatry. *World Psychiatry*. 2016;15(2):103-111. doi:10.1002/wps.20311
8. Lebares CC, Coaston TN, Delucchi KL, et al. Enhanced Stress Resilience Training in Surgeons: Iterative Adaptation and Biopsychosocial Effects in 2 Small Randomized Trials. *Ann Surg*. 2021;273(3):424-432. doi:10.1097/SLA.0000000000004145
9. Ellis RJ, Nicolas JD, Cheung E, et al. Comprehensive Characterization of the General Surgery Residency Learning Environment and the Association With Resident Burnout. *Ann Surg*. 2021;274(1):6-11. doi:10.1097/SLA.0000000000004796
10. Khorfan R, Hu YY, Agarwal G, et al. The Role of Personal Accomplishment in General Surgery Resident Well-being. *Ann Surg*. 2021;274(1):12-17. doi:10.1097/SLA.0000000000004768
11. Cohen S, Janicki-Deverts D. Who's Stressed? Distributions of Psychological Stress in the United States in Probability Samples from 1983, 2006, and 2009: PSYCHOLOGICAL STRESS IN THE U.S. *J Appl Soc Psychol*. 2012;42(6):1320-1334. doi:10.1111/j.1559-1816.2012.00900.x
12. Nielsen MG, Ørnbøl E, Vestergaard M, et al. The construct validity of the Perceived Stress Scale. *J Psychosom Res*. 2016;84:22-30. doi:10.1016/j.jpsychores.2016.03.009
13. Nordin M, Nordin S. Psychometric evaluation and normative data of the Swedish version of the 10-item perceived stress scale. *Scand J Psychol*. 2013;54(6):502-507. doi:10.1111/sjop.12071
14. Addolorato G, Ancona C, Capristo E, et al. State and trait anxiety in women affected by allergic and vasomotor rhinitis. *J Psychosom Res*. 1999;46(3):283-289. doi:10.1016/S0022-3999(98)00109-3
15. Harvey A, Bandiera G, Nathens AB, LeBlanc VR. Impact of stress on resident performance in simulated trauma scenarios. *J Trauma Acute Care Surg*. 2012;72(2):497-503. doi:10.1097/TA.0b013e31821f84be
16. Knight RG, Waal-Manning HJ, Spears GF. Some norms and reliability data for the State-Trait Anxiety Inventory and the Zung Self-Rating Depression scale. *Br J Clin Psychol*. 1983;22(4):245-249. doi:10.1111/j.2044-8260.1983.tb00610.x
17. Spielberger et al. Manual for the State-Trait Anxiety Inventory. <http://ubir.buffalo.edu/xmlui/handle/10477/2895>

18. Stefanidis D, Anton NE, Howley LD, et al. Effectiveness of a comprehensive mental skills curriculum in enhancing surgical performance: Results of a randomized controlled trial. *Am J Surg.* 2017;213(2):318-324. doi:10.1016/j.amjsurg.2016.10.016
19. Spielberg et al. Manual for the State-Trait Anxiety Inventory (Form Y1 – Y2). *Palo Alto CA Consult Psychol Press.* 1983;Vol. IV.
20. Dhingra SS, Kroenke K, Zack MM, Strine TW, Balluz LS. PHQ-8 Days: a measurement option for DSM-5 Major Depressive Disorder (MDD) severity. *Popul Health Metr.* 2011;9(1):11. doi:10.1186/1478-7954-9-11
21. Shin C, Lee SH, Han KM, Yoon HK, Han C. Comparison of the Usefulness of the PHQ-8 and PHQ-9 for Screening for Major Depressive Disorder: Analysis of Psychiatric Outpatient Data. *Psychiatry Investig.* 2019;16(4):300-305. doi:10.30773/pi.2019.02.01
22. Sanne B, Torp S, Mykletun A, Dahl AA. The Swedish Demand—Control—Support Questionnaire (DCSQ): Factor structure, item analyses, and internal consistency in a large population. *Scand J Public Health.* 2005;33(3):166-174. doi:10.1080/14034940410019217
23. Crawford ER, LePine JA, Rich BL. Linking job demands and resources to employee engagement and burnout: A theoretical extension and meta-analytic test. *J Appl Psychol.* 2010;95(5):834-848. doi:10.1037/a0019364
